# Supplementary material for: Glanders Diagnosis in an Asymptomatic Mare from Brazil: Insights from Serology, Microbiological Culture, Mass Spectrometry, and Genome Sequencing
Source: MDPI journal article supplement (doi:10.3390/pathogens12101250), 2023-10-17
Supplement: s1 [file s1]

**Table S1.** Classification of *Burkholderia mallei* BAC 86/19 strain by MALDI-TOF MS.

| <b>Analyte Name</b> | <b>Organism (best match)</b> | <b>Score Value</b> | <b>Organism (second best match)</b> | <b>Score Value</b> |
|---------------------|------------------------------|--------------------|-------------------------------------|--------------------|
| 07/07               | <i>B. mallei</i> BAC 86/19   | 2.501              | <i>B. pseudomallei</i> 2356         | 2.039              |
| 07/07               | <i>B. mallei</i> BAC 86/19   | 2.527              | <i>B. mallei</i> 010                | 2.101              |
| P2BM                | <i>B. mallei</i> BAC 86/19   | 2.502              | <i>B. pseudomallei</i> 2356         | 2.062              |
| P2BM                | <i>B. mallei</i> BAC 86/19   | 2.395              | <i>B. pseudomallei</i> 2356         | 2.058              |
| P2BM                | <i>B. mallei</i> BAC 86/19   | 2.327              | <i>B. pseudomallei</i> 2356         | 2.001              |
| AS                  | <i>B. mallei</i> BAC 86/19   | 2.602              | <i>B. pseudomallei</i> RKI          | 2.083              |
| AS                  | <i>B. mallei</i> BAC 86/19   | 2.524              | <i>B. pseudomallei</i> RKI          | 2.143              |
| AS                  | <i>B. mallei</i> BAC 86/19   | 2.502              | <i>B. pseudomallei</i> RKI          | 2.105              |
| B2F                 | <i>B. mallei</i> BAC 86/19   | 2.492              | <i>B. pseudomallei</i> 2356         | 2.069              |
| B2F                 | <i>B. mallei</i> BAC 86/19   | 2.568              | <i>B. mallei</i> Ore                | 2.067              |
| B2F                 | <i>B. mallei</i> BAC 86/19   | 2.566              | <i>B. mallei</i> Ore                | 2.114              |
| B2M                 | <i>B. mallei</i> BAC 86/19   | 2.342              | <i>B. mallei</i> Ore                | 2.051              |
| B4F                 | <i>B. mallei</i> BAC 86/19   | 2.565              | <i>B. pseudomallei</i> RKI          | 2.246              |
| B4F                 | <i>B. mallei</i> BAC 86/19   | 2.614              | <i>B. pseudomallei</i> RKI          | 2.245              |
| B4F                 | <i>B. mallei</i> BAC 86/19   | 2.536              | <i>B. mallei</i> Flash              | 2.108              |
| B4F                 | <i>B. mallei</i> BAC 86/19   | 2.558              | <i>B. pseudomallei</i> RKI          | 2.252              |
| B4F                 | <i>B. mallei</i> BAC 86/19   | 2.581              | <i>B. pseudomallei</i> RKI          | 2.337              |
| B4M                 | <i>B. mallei</i> BAC 86/19   | 2.577              | <i>B. mallei</i> Ore                | 2.089              |

|       |                            |       |                                 |       |
|-------|----------------------------|-------|---------------------------------|-------|
| B4M   | <i>B. mallei</i> BAC 86/19 | 2.619 | <i>B. mallei</i> Ore            | 2.197 |
| M15   | <i>B. mallei</i> BAC 86/19 | 2.514 | <i>B. pseudomallei</i> RKI      | 2.229 |
| M15   | <i>B. mallei</i> BAC 86/19 | 2.508 | <i>B. pseudomallei</i> RKI      | 2.113 |
| M15   | <i>B. mallei</i> BAC 86/19 | 2.584 | <i>B. pseudomallei</i> RKI      | 2.246 |
| M16   | <i>B. mallei</i> BAC 86/19 | 2.338 | <i>B. mallei</i> 176            | 2.056 |
| M2-11 | <i>B. mallei</i> BAC 86/19 | 2.518 | <i>B. pseudomallei</i> RKI      | 2.273 |
| M2-11 | <i>B. mallei</i> BAC 86/19 | 2.56  | <i>B. mallei</i> Ore            | 2.101 |
| M2-11 | <i>B. mallei</i> BAC 86/19 | 2.55  | <i>B. pseudomallei</i> RKI      | 2.163 |
| M4-14 | <i>B. mallei</i> BAC 86/19 | 2.343 | <i>B. mallei</i> ATCC 23344 RKI | 2.066 |
| M7-18 | <i>B. mallei</i> BAC 86/19 | 2.547 | <i>B. mallei</i> Flash          | 2.18  |
| M7-18 | <i>B. mallei</i> BAC 86/19 | 2.588 | <i>B. mallei</i> Ore            | 2.216 |
| M8-19 | <i>B. mallei</i> BAC 86/19 | 2.509 | <i>B. mallei</i> Flash          | 2.26  |

---

*B. mallei* 86/19 - MSP generated in this work, as described in Material and Methods section;  
*B. mallei* ATCC 23344 RKI and *B. pseudomallei* RKI - MSPs generated as described (Verbisck et al., 2020) using open access mass spectra from RKI - Robert Koch Institute, Berlin, Germany (Lasch et al., 2016);  
*B. mallei* 010, 176, Ore and Flash and *B. pseudomallei* 2356 - mass spectra and MSPs generated as described (Verbisck et al., 2020), from clinical strains isolated at LFDA-MG - Federal Agricultural Defense Laboratory of Minas Gerais, Brazil.
